# Supplementary material for: A free-standing VN/MXene composite anode for high-performance Li-ion hybrid capacitors
Source: Royal Society of Chemistry journal article supplement (doi:10.1039/d2ra00496h), 2022-01-01
Supplement: d2ra00496h1.pdf [file d2ra00496h1.pdf]

## Supporting Information

### A free-standing VN/MXene composite anode for high-performance Li-ion hybrid capacitor

Zihan Guo<sup>a</sup>, Zhiwei Wang<sup>ab</sup>, Dong Wang<sup>a</sup>, Yanfang Gao<sup>\*a</sup>, Jinrong Liu<sup>\*a</sup>

<sup>a</sup>School of Chemical Engineering, Inner Mongolia University of Technology, Hohhot, 010051, P.R. China

Mail addresses: yf\_gao@imut.edu.cn; [liujr@imut.edu.cn](mailto:liujr@imut.edu.cn)

<sup>b</sup>Engineering Management Department, Inner Mongolia University of Finance and Economics, Hohhot, 010070, P.R. China

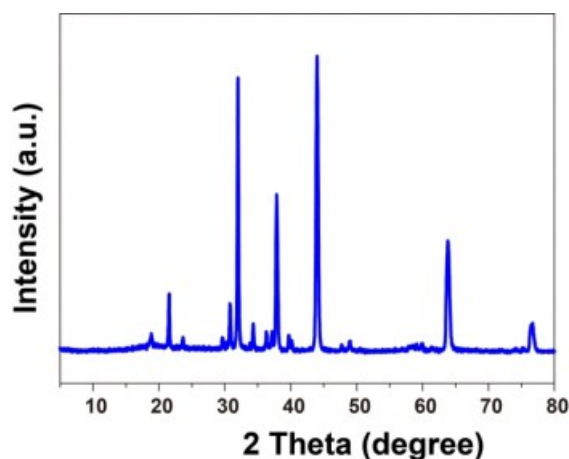

**Figure S1** XRD patterns of the prepared V<sub>2</sub>O<sub>5</sub> nanowires.

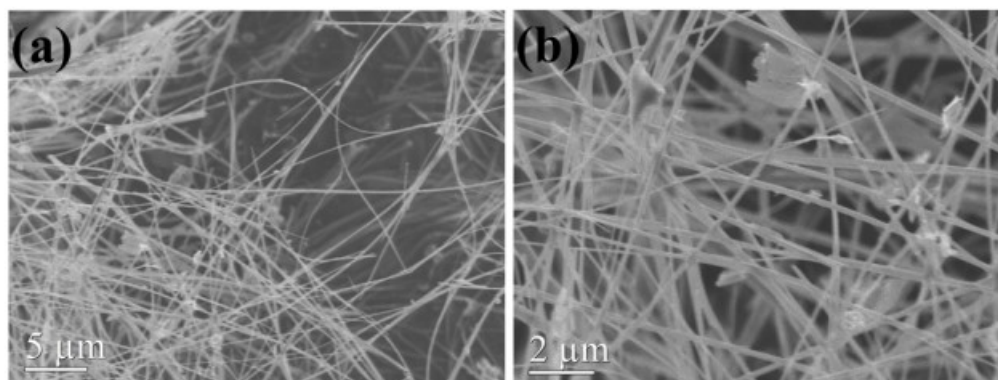

**Figure S2** SEM image of the prepared V<sub>2</sub>O<sub>5</sub> nanowires.

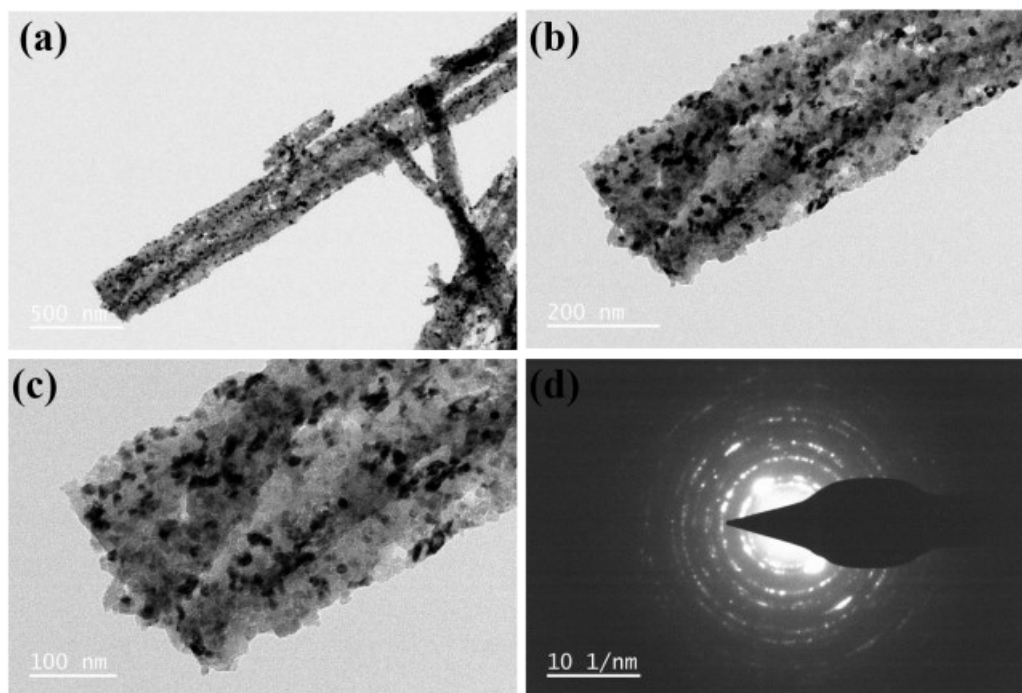

**Figure S3** (a-c) TEM images and (d) the SAED pattern of the prepared VN nanowires.

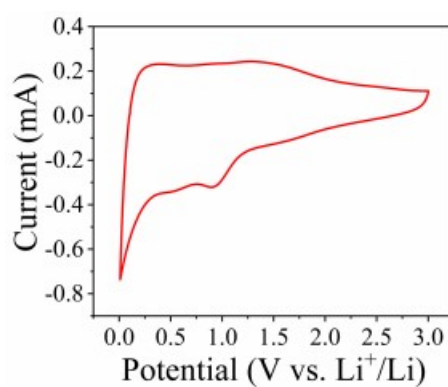

**Figure S4** CV curve of the VN/MXene at  $0.5 \text{ mv s}^{-1}$  in the working voltage window of 0.01-3.0 V.

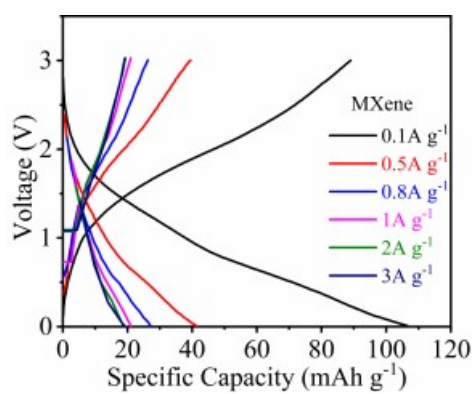

**Figure S5** The discharge-charge profiles of  $\text{Ti}_3\text{C}_2\text{Tx}$  film at different current densities.
